# Supplementary material
Source: PubMed Central journal article supplement (PMC7293108)
Supplement: NIHMS1581438-supplement-6.pdf [file NIHMS1581438-supplement-6.pdf]

## **Supplemental Information Inventory**

**Table S1.** Contains all the parameter sets used in the simulations as well as the detailed summaries of which simulations showed coordinated high states per network. Additionally, it contains all the results of the analysis when model assumptions were relaxed and the two-dimensional RNA-FISH data. Related to Figure 2, Figure 3, Figure S1, Figure S2, Figure S3, Figure S4, Figure S5, Figure S6 and STAR Methods.

**Table S2.** Contains data used for the comparative network inference analysis. Related to Figure 5, Figure S8 and STAR Methods.

**Document S1.** Contains Figures S1-S9.
